# Supplementary material
Source: PubMed Central journal article supplement (PMC4369687)
Supplement: 97320630011107S1.pdf [file 97320630011107S1.pdf]

## Supplementary Material

**Table 1:** The number entries extracted from several sources. Repeated data record with different accession number in same source was removed

| Source name                        | Number of entries |
|------------------------------------|-------------------|
| UniProtKB/Swiss-Prot               | 186               |
| GenBank                            | 110               |
| Protein Data Bank (PDB)            | 102               |
| Protein Information Resource (PIR) | 4                 |
| Protein Resource Format (PRF)      | 3                 |
